# Supplementary material for: Immune and pathologic responses in patients with localized prostate cancer who received daratumumab (anti-CD38) or edicotinib (CSF-1R inhibitor)
Source: HighWire-hosted journal article supplement (doi:10.1136/jitc-2022-006262), 2023-03-01
Supplement: jitc-2022-006262supp002_data_supplement.pdf [file jitc-2022-006262supp002_data_supplement.pdf]

**Supplementary Table 1. Antibodies used for immunohistochemistry.**

| <b>Antibody</b> | <b>Vendor</b>    | <b>Catalog #</b> | <b>Clone</b> | <b>Dilution</b> |
|-----------------|------------------|------------------|--------------|-----------------|
| CD38            | Leica biosystems | NCL-L-CD38-290   | SPC32        | 1:100           |
| CSF1R           | Abcam            | ab183316         | SP211        | 1:250           |
| CD3             | Agilent          | A045201-2        | Polyclonal   | 1:100           |
| CD8             | Thermo           | MS-457S          | C8/144B      | 1:25            |
| CD20            | Agilent          | M0755501-2       | L26          | 1:1400          |
| CD68            | Agilent          | M087601-2        | PG-M1        | 1:450           |
| CD45RO          | Leica biosystems | PA0146           | UCHL1        | 1:75            |
| FOXP3           | BioLegend        | 320102           | 206D         | 1:50            |
| PD-1            | Abcam            | ab137132         | EPR4877(2)   | 1:250           |
| PD-L1           | CST              | 13684            | E1L3N        | 1:100           |

| Marker | Clone  | Vendor        | Catalog #  |
|--------|--------|---------------|------------|
| CD45   | 2D1    | Biolegend     | 368528     |
| CD3    | UCHT1  | eBioscience   | 58-0038-42 |
| CD4    | SK3    | BDBiosciences | 563875     |
| CD8    | RPA-T8 | BDBiosciences | 564526     |
| CD19   | HIB19  | Biolegend     | 302252     |
| CD56   | B159   | BDBiosciences | 564488     |
| CD11b  | ICRF44 | BDBiosciences | 557754     |
| CD14   | MφP9   | BDBiosciences | 563372     |

Sup  
ple  
me  
nta  
ry  
Tab  
le 2.  
Ant  
ibo  
dies  
use  
d  
for  
flo

w cytometry analysis.

|                |            |               |            |
|----------------|------------|---------------|------------|
| HLA-DR         | L243       | BDBiosciences | 339194     |
| CD25           | 2A3        | BDBiosciences | 564033     |
| CD127          | HIL-7R-M21 | BDBiosciences | 562662     |
| Foxp3          | 236A/E7    | eBiosciences  | 25-4777-42 |
| CD38           | Humab-003  | Janssen       | N/A        |
| CD115 (CSF-1R) | 9-4D2-1E4  | Biolegend     | 347304     |

Supplementary Table 3. All treatment-emergent events regardless of attribution.

| Adverse Event                 | Arm A: Daratumumab<br>(N=15) |                  | Arm B: Edicotinib<br>(N=10) |                  | Total<br>(N=25) |                  |
|-------------------------------|------------------------------|------------------|-----------------------------|------------------|-----------------|------------------|
|                               | All<br>N(%)                  | Grade 3+<br>N(%) | All<br>N(%)                 | Grade 3+<br>N(%) | All<br>N(%)     | Grade 3+<br>N(%) |
| <b>Any Event</b>              | <b>15(100%)</b>              | <b>9(60%)</b>    | <b>10(100%)</b>             | <b>3(30%)</b>    | <b>25(100%)</b> | <b>12(48%)</b>   |
| Hyperglycemia                 | 11(73%)                      | 2(13%)           | 5(50%)                      | 0(0%)            | 16(64%)         | 2(8%)            |
| Infusion reaction             | 5(33%)                       | 2(13%)           | 0(0%)                       | 0(0%)            | 5(20%)          | 2(8%)            |
| Lipase increased              | 1(7%)                        | 1(7%)            | 1(10%)                      | 1(10%)           | 2(8%)           | 2(8%)            |
| Anemia                        | 10(67%)                      | 1(7%)            | 5(50%)                      | 0(0%)            | 15(60%)         | 1(4%)            |
| Hyperkalemia                  | 3(20%)                       | 1(7%)            | 1(10%)                      | 0(0%)            | 4(16%)          | 1(4%)            |
| Acute kidney injury           | 2(13%)                       | 1(7%)            | 0(0%)                       | 0(0%)            | 2(8%)           | 1(4%)            |
| Death NOS                     | 1(7%)                        | 1(7%)            | 0(0%)                       | 0(0%)            | 1(4%)           | 1(4%)            |
| Lymphocele                    | 0(0%)                        | 0(0%)            | 1(10%)                      | 1(10%)           | 1(4%)           | 1(4%)            |
| Small intestinal obstruction  | 0(0%)                        | 0(0%)            | 1(10%)                      | 1(10%)           | 1(4%)           | 1(4%)            |
| Urticaria                     | 1(7%)                        | 1(7%)            | 0(0%)                       | 0(0%)            | 1(4%)           | 1(4%)            |
| Vertigo                       | 1(7%)                        | 1(7%)            | 0(0%)                       | 0(0%)            | 1(4%)           | 1(4%)            |
| Fatigue/Malaise               | 9(60%)                       | 0(0%)            | 3(30%)                      | 0(0%)            | 12(48%)         | 0(0%)            |
| Pain                          | 7(47%)                       | 0(0%)            | 4(40%)                      | 0(0%)            | 11(44%)         | 0(0%)            |
| Paresthesia                   | 4(27%)                       | 0(0%)            | 4(40%)                      | 0(0%)            | 8(32%)          | 0(0%)            |
| Creatinine increased          | 3(20%)                       | 0(0%)            | 4(40%)                      | 0(0%)            | 7(28%)          | 0(0%)            |
| Erectile dysfunction          | 3(20%)                       | 0(0%)            | 4(40%)                      | 0(0%)            | 7(28%)          | 0(0%)            |
| Rhinitis                      | 6(40%)                       | 0(0%)            | 0(0%)                       | 0(0%)            | 6(24%)          | 0(0%)            |
| ALT increased                 | 3(20%)                       | 0(0%)            | 2(20%)                      | 0(0%)            | 5(20%)          | 0(0%)            |
| Nocturia                      | 4(27%)                       | 0(0%)            | 1(10%)                      | 0(0%)            | 5(20%)          | 0(0%)            |
| Sore throat                   | 5(33%)                       | 0(0%)            | 0(0%)                       | 0(0%)            | 5(20%)          | 0(0%)            |
| White blood cell decreased    | 2(13%)                       | 0(0%)            | 3(30%)                      | 0(0%)            | 5(20%)          | 0(0%)            |
| AST increased                 | 0(0%)                        | 0(0%)            | 4(40%)                      | 0(0%)            | 4(16%)          | 0(0%)            |
| Abdominal pain                | 3(20%)                       | 0(0%)            | 1(10%)                      | 0(0%)            | 4(16%)          | 0(0%)            |
| Bloating/abdominal distension | 3(20%)                       | 0(0%)            | 1(10%)                      | 0(0%)            | 4(16%)          | 0(0%)            |
| Constipation                  | 3(20%)                       | 0(0%)            | 1(10%)                      | 0(0%)            | 4(16%)          | 0(0%)            |
| Dyspepsia/acid reflux         | 4(27%)                       | 0(0%)            | 0(0%)                       | 0(0%)            | 4(16%)          | 0(0%)            |
| Headache                      | 3(20%)                       | 0(0%)            | 1(10%)                      | 0(0%)            | 4(16%)          | 0(0%)            |
| Lymphocyte count decreased    | 2(13%)                       | 0(0%)            | 2(20%)                      | 0(0%)            | 4(16%)          | 0(0%)            |
| Urinary incontinence          | 3(20%)                       | 0(0%)            | 1(10%)                      | 0(0%)            | 4(16%)          | 0(0%)            |
| Anorexia                      | 2(13%)                       | 0(0%)            | 1(10%)                      | 0(0%)            | 3(12%)          | 0(0%)            |
| Chloride increased            | 3(20%)                       | 0(0%)            | 0(0%)                       | 0(0%)            | 3(12%)          | 0(0%)            |
| Concentration impairment      | 2(13%)                       | 0(0%)            | 1(10%)                      | 0(0%)            | 3(12%)          | 0(0%)            |
| Cough                         | 2(13%)                       | 0(0%)            | 1(10%)                      | 0(0%)            | 3(12%)          | 0(0%)            |
| Diarrhea                      | 3(20%)                       | 0(0%)            | 0(0%)                       | 0(0%)            | 3(12%)          | 0(0%)            |
| Fever                         | 2(13%)                       | 0(0%)            | 1(10%)                      | 0(0%)            | 3(12%)          | 0(0%)            |
| Hypertension                  | 1(7%)                        | 0(0%)            | 2(20%)                      | 0(0%)            | 3(12%)          | 0(0%)            |
| Hyponatremia                  | 3(20%)                       | 0(0%)            | 0(0%)                       | 0(0%)            | 3(12%)          | 0(0%)            |
| Insomnia                      | 3(20%)                       | 0(0%)            | 0(0%)                       | 0(0%)            | 3(12%)          | 0(0%)            |
| Myalgia                       | 3(20%)                       | 0(0%)            | 0(0%)                       | 0(0%)            | 3(12%)          | 0(0%)            |
| Nausea                        | 3(20%)                       | 0(0%)            | 0(0%)                       | 0(0%)            | 3(12%)          | 0(0%)            |
| Neutrophil count decreased    | 2(13%)                       | 0(0%)            | 1(10%)                      | 0(0%)            | 3(12%)          | 0(0%)            |
| Rash                          | 2(13%)                       | 0(0%)            | 1(10%)                      | 0(0%)            | 3(12%)          | 0(0%)            |
| Sinus bradycardia             | 3(20%)                       | 0(0%)            | 0(0%)                       | 0(0%)            | 3(12%)          | 0(0%)            |
| Urinary frequency             | 2(13%)                       | 0(0%)            | 1(10%)                      | 0(0%)            | 3(12%)          | 0(0%)            |
| Arthralgia                    | 1(7%)                        | 0(0%)            | 1(10%)                      | 0(0%)            | 2(8%)           | 0(0%)            |
| Atelectasis                   | 2(13%)                       | 0(0%)            | 0(0%)                       | 0(0%)            | 2(8%)           | 0(0%)            |
| Bladder spasm                 | 2(13%)                       | 0(0%)            | 0(0%)                       | 0(0%)            | 2(8%)           | 0(0%)            |
| Blurred vision                | 2(13%)                       | 0(0%)            | 0(0%)                       | 0(0%)            | 2(8%)           | 0(0%)            |
| CO2 decreased                 | 2(13%)                       | 0(0%)            | 0(0%)                       | 0(0%)            | 2(8%)           | 0(0%)            |

| Adverse Event                                    | Arm A: Daratumumab<br>(N=15) |                  | Arm B: Edicotinib<br>(N=10) |                  | Total<br>(N=25) |                  |
|--------------------------------------------------|------------------------------|------------------|-----------------------------|------------------|-----------------|------------------|
|                                                  | All<br>N(%)                  | Grade 3+<br>N(%) | All<br>N(%)                 | Grade 3+<br>N(%) | All<br>N(%)     | Grade 3+<br>N(%) |
| Chest pain                                       | 2(13%)                       | 0(0%)            | 0(0%)                       | 0(0%)            | 2(8%)           | 0(0%)            |
| Chloride decreased                               | 2(13%)                       | 0(0%)            | 0(0%)                       | 0(0%)            | 2(8%)           | 0(0%)            |
| Cold intolerance                                 | 2(13%)                       | 0(0%)            | 0(0%)                       | 0(0%)            | 2(8%)           | 0(0%)            |
| Dyspnea                                          | 2(13%)                       | 0(0%)            | 0(0%)                       | 0(0%)            | 2(8%)           | 0(0%)            |
| Ear pain                                         | 2(13%)                       | 0(0%)            | 0(0%)                       | 0(0%)            | 2(8%)           | 0(0%)            |
| Edema                                            | 2(13%)                       | 0(0%)            | 0(0%)                       | 0(0%)            | 2(8%)           | 0(0%)            |
| Generalized muscle weakness                      | 2(13%)                       | 0(0%)            | 0(0%)                       | 0(0%)            | 2(8%)           | 0(0%)            |
| Hypnatremia                                      | 2(13%)                       | 0(0%)            | 0(0%)                       | 0(0%)            | 2(8%)           | 0(0%)            |
| Hypokalemia                                      | 2(13%)                       | 0(0%)            | 0(0%)                       | 0(0%)            | 2(8%)           | 0(0%)            |
| Investigations - Other, specify-<br>LDL increase | 2(13%)                       | 0(0%)            | 0(0%)                       | 0(0%)            | 2(8%)           | 0(0%)            |
| Neutrophils increased                            | 2(13%)                       | 0(0%)            | 0(0%)                       | 0(0%)            | 2(8%)           | 0(0%)            |
| Platelet count decreased                         | 2(13%)                       | 0(0%)            | 0(0%)                       | 0(0%)            | 2(8%)           | 0(0%)            |
| Sinus tachycardia                                | 2(13%)                       | 0(0%)            | 0(0%)                       | 0(0%)            | 2(8%)           | 0(0%)            |
| Sinusitis/Upper Respiratory<br>Infection         | 1(7%)                        | 0(0%)            | 1(10%)                      | 0(0%)            | 2(8%)           | 0(0%)            |
| Tremor                                           | 2(13%)                       | 0(0%)            | 0(0%)                       | 0(0%)            | 2(8%)           | 0(0%)            |
| Urinary urgency                                  | 2(13%)                       | 0(0%)            | 0(0%)                       | 0(0%)            | 2(8%)           | 0(0%)            |
| Wheezing                                         | 1(7%)                        | 0(0%)            | 1(10%)                      | 0(0%)            | 2(8%)           | 0(0%)            |
| Abscess                                          | 0(0%)                        | 0(0%)            | 1(10%)                      | 0(0%)            | 1(4%)           | 0(0%)            |
| Agitation                                        | 1(7%)                        | 0(0%)            | 0(0%)                       | 0(0%)            | 1(4%)           | 0(0%)            |
| Albumin increased                                | 1(7%)                        | 0(0%)            | 0(0%)                       | 0(0%)            | 1(4%)           | 0(0%)            |
| Alk phos increased                               | 0(0%)                        | 0(0%)            | 1(10%)                      | 0(0%)            | 1(4%)           | 0(0%)            |
| Alopecia                                         | 1(7%)                        | 0(0%)            | 0(0%)                       | 0(0%)            | 1(4%)           | 0(0%)            |
| Anastomotic leak                                 | 1(7%)                        | 0(0%)            | 0(0%)                       | 0(0%)            | 1(4%)           | 0(0%)            |
| Anxiety                                          | 1(7%)                        | 0(0%)            | 0(0%)                       | 0(0%)            | 1(4%)           | 0(0%)            |
| Ascites                                          | 1(7%)                        | 0(0%)            | 0(0%)                       | 0(0%)            | 1(4%)           | 0(0%)            |
| Aspiration                                       | 1(7%)                        | 0(0%)            | 0(0%)                       | 0(0%)            | 1(4%)           | 0(0%)            |
| BUN increased                                    | 1(7%)                        | 0(0%)            | 0(0%)                       | 0(0%)            | 1(4%)           | 0(0%)            |
| CO2 increased                                    | 1(7%)                        | 0(0%)            | 0(0%)                       | 0(0%)            | 1(4%)           | 0(0%)            |
| Chest Congestion                                 | 1(7%)                        | 0(0%)            | 0(0%)                       | 0(0%)            | 1(4%)           | 0(0%)            |
| Chills                                           | 1(7%)                        | 0(0%)            | 0(0%)                       | 0(0%)            | 1(4%)           | 0(0%)            |
| Cholelithiasis                                   | 1(7%)                        | 0(0%)            | 0(0%)                       | 0(0%)            | 1(4%)           | 0(0%)            |
| Cholesterol increased                            | 1(7%)                        | 0(0%)            | 0(0%)                       | 0(0%)            | 1(4%)           | 0(0%)            |
| Conduction abnormality*                          | 1(7%)                        | 0(0%)            | 0(0%)                       | 0(0%)            | 1(4%)           | 0(0%)            |
| Confusion                                        | 1(7%)                        | 0(0%)            | 0(0%)                       | 0(0%)            | 1(4%)           | 0(0%)            |
| Coronary atherosclerosis                         | 1(7%)                        | 0(0%)            | 0(0%)                       | 0(0%)            | 1(4%)           | 0(0%)            |
| Cortisol decreased                               | 0(0%)                        | 0(0%)            | 1(10%)                      | 0(0%)            | 1(4%)           | 0(0%)            |
| Dehydration                                      | 1(7%)                        | 0(0%)            | 0(0%)                       | 0(0%)            | 1(4%)           | 0(0%)            |
| Diaphoresis                                      | 1(7%)                        | 0(0%)            | 0(0%)                       | 0(0%)            | 1(4%)           | 0(0%)            |
| Dizziness                                        | 0(0%)                        | 0(0%)            | 1(10%)                      | 0(0%)            | 1(4%)           | 0(0%)            |
| Dry mouth                                        | 1(7%)                        | 0(0%)            | 0(0%)                       | 0(0%)            | 1(4%)           | 0(0%)            |
| Dysphagia                                        | 1(7%)                        | 0(0%)            | 0(0%)                       | 0(0%)            | 1(4%)           | 0(0%)            |
| Dysuria                                          | 1(7%)                        | 0(0%)            | 0(0%)                       | 0(0%)            | 1(4%)           | 0(0%)            |
| Ejaculation disorder                             | 1(7%)                        | 0(0%)            | 0(0%)                       | 0(0%)            | 1(4%)           | 0(0%)            |
| Enteritis                                        | 1(7%)                        | 0(0%)            | 0(0%)                       | 0(0%)            | 1(4%)           | 0(0%)            |
| Floaters                                         | 1(7%)                        | 0(0%)            | 0(0%)                       | 0(0%)            | 1(4%)           | 0(0%)            |
| Flu like symptoms                                | 1(7%)                        | 0(0%)            | 0(0%)                       | 0(0%)            | 1(4%)           | 0(0%)            |
| Hematoma                                         | 0(0%)                        | 0(0%)            | 1(10%)                      | 0(0%)            | 1(4%)           | 0(0%)            |
| Hematuria                                        | 1(7%)                        | 0(0%)            | 0(0%)                       | 0(0%)            | 1(4%)           | 0(0%)            |
| Hoarseness                                       | 1(7%)                        | 0(0%)            | 0(0%)                       | 0(0%)            | 1(4%)           | 0(0%)            |
| Hypertriglyceridemia                             | 1(7%)                        | 0(0%)            | 0(0%)                       | 0(0%)            | 1(4%)           | 0(0%)            |

| Adverse Event                                        | Arm A: Daratumumab<br>(N=15) |                  | Arm B: Edicotinib<br>(N=10) |                  | Total<br>(N=25) |                  |
|------------------------------------------------------|------------------------------|------------------|-----------------------------|------------------|-----------------|------------------|
|                                                      | All<br>N(%)                  | Grade 3+<br>N(%) | All<br>N(%)                 | Grade 3+<br>N(%) | All<br>N(%)     | Grade 3+<br>N(%) |
| Hypoalbuminemia                                      | 1(7%)                        | 0(0%)            | 0(0%)                       | 0(0%)            | 1(4%)           | 0(0%)            |
| Hypocalcemia                                         | 1(7%)                        | 0(0%)            | 0(0%)                       | 0(0%)            | 1(4%)           | 0(0%)            |
| Hypoglycemia                                         | 1(7%)                        | 0(0%)            | 0(0%)                       | 0(0%)            | 1(4%)           | 0(0%)            |
| Hypomagnesemia                                       | 1(7%)                        | 0(0%)            | 0(0%)                       | 0(0%)            | 1(4%)           | 0(0%)            |
| Hypophosphatemia                                     | 0(0%)                        | 0(0%)            | 1(10%)                      | 0(0%)            | 1(4%)           | 0(0%)            |
| LDH increased                                        | 0(0%)                        | 0(0%)            | 1(10%)                      | 0(0%)            | 1(4%)           | 0(0%)            |
| LDL increased                                        | 1(7%)                        | 0(0%)            | 0(0%)                       | 0(0%)            | 1(4%)           | 0(0%)            |
| Laceration                                           | 1(7%)                        | 0(0%)            | 0(0%)                       | 0(0%)            | 1(4%)           | 0(0%)            |
| Monocytes increased                                  | 1(7%)                        | 0(0%)            | 0(0%)                       | 0(0%)            | 1(4%)           | 0(0%)            |
| Mouth sores                                          | 1(7%)                        | 0(0%)            | 0(0%)                       | 0(0%)            | 1(4%)           | 0(0%)            |
| Other infection                                      | 1(7%)                        | 0(0%)            | 0(0%)                       | 0(0%)            | 1(4%)           | 0(0%)            |
| Overweight                                           | 1(7%)                        | 0(0%)            | 0(0%)                       | 0(0%)            | 1(4%)           | 0(0%)            |
| PT decreased                                         | 1(7%)                        | 0(0%)            | 0(0%)                       | 0(0%)            | 1(4%)           | 0(0%)            |
| Peripheral sensory neuropathy                        | 1(7%)                        | 0(0%)            | 0(0%)                       | 0(0%)            | 1(4%)           | 0(0%)            |
| Platelet count increased                             | 1(7%)                        | 0(0%)            | 0(0%)                       | 0(0%)            | 1(4%)           | 0(0%)            |
| Pressured speech                                     | 1(7%)                        | 0(0%)            | 0(0%)                       | 0(0%)            | 1(4%)           | 0(0%)            |
| Pruritus                                             | 1(7%)                        | 0(0%)            | 0(0%)                       | 0(0%)            | 1(4%)           | 0(0%)            |
| Reversible posterior<br>leukoencephalopathy syndrome | 1(7%)                        | 0(0%)            | 0(0%)                       | 0(0%)            | 1(4%)           | 0(0%)            |
| Shingles                                             | 1(7%)                        | 0(0%)            | 0(0%)                       | 0(0%)            | 1(4%)           | 0(0%)            |
| Sinus pain                                           | 1(7%)                        | 0(0%)            | 0(0%)                       | 0(0%)            | 1(4%)           | 0(0%)            |
| T3 decreased                                         | 1(7%)                        | 0(0%)            | 0(0%)                       | 0(0%)            | 1(4%)           | 0(0%)            |
| TSH increased                                        | 1(7%)                        | 0(0%)            | 0(0%)                       | 0(0%)            | 1(4%)           | 0(0%)            |
| Twisted ankle                                        | 1(7%)                        | 0(0%)            | 0(0%)                       | 0(0%)            | 1(4%)           | 0(0%)            |
| Urinary retention                                    | 1(7%)                        | 0(0%)            | 0(0%)                       | 0(0%)            | 1(4%)           | 0(0%)            |
| Urinary tract infection                              | 1(7%)                        | 0(0%)            | 0(0%)                       | 0(0%)            | 1(4%)           | 0(0%)            |
| Urinary urgency                                      | 1(7%)                        | 0(0%)            | 0(0%)                       | 0(0%)            | 1(4%)           | 0(0%)            |
| White blood cells increased                          | 1(7%)                        | 0(0%)            | 0(0%)                       | 0(0%)            | 1(4%)           | 0(0%)            |
| Yellow skin tone                                     | 1(7%)                        | 0(0%)            | 0(0%)                       | 0(0%)            | 1(4%)           | 0(0%)            |
| aPTT prolonged                                       | 0(0%)                        | 0(0%)            | 1(10%)                      | 0(0%)            | 1(4%)           | 0(0%)            |

\* One patient had a cardiac conduction abnormality with measures 2 weeks apart. The first showed a first degree AV block with moderate intraventricular conduction delay while the second showed first degree AV block 2 weeks later

**Supplementary Table 4. Pathologic details of daratumumab-treated samples**

| <b><u>PA13-0291 Acc #</u></b> | <b><u>Gleason Score at Biopsy</u></b> | <b><u>Gleason Score at RP</u></b> | <b><u>Pathologic T Stage at RP</u></b> | <b><u>Pathologic N Stage at RP</u></b> | <b><u>Comment</u></b> |
|-------------------------------|---------------------------------------|-----------------------------------|----------------------------------------|----------------------------------------|-----------------------|
| 2866                          | 9 (5+4)                               | 9 (5+4)                           | pT3b                                   | N1                                     |                       |
| 3228                          | 9 (4+5)                               | 9 (4+5)                           | pT3b                                   | N1                                     |                       |
| 3229                          | 9 (4+5)                               | 9 (4+5)                           | pT3b                                   | N1                                     |                       |
| 2953                          | 9 (4+5)                               | 9 (4+5)                           | pT3b                                   | N0                                     |                       |
| 2917                          | 9 (4+5)                               | 9 (4+5)                           | pT3a                                   | N0                                     |                       |
| 3253                          | 9 (4+5)                               | 7 (4+3)                           | pT2                                    | N0                                     |                       |
| 3821                          | 8 (4+4)                               | 7 (3+4)                           | pT3a                                   | N0                                     | Tertiary pattern 5    |
| 3251                          | 8 (4+4)                               | 9 (4+5)                           | pT3b                                   | N1                                     |                       |
| 3407                          | 8 (4+4)                               | 9 (4+5)                           | pT3b                                   | N1                                     |                       |
| 2875                          | 8 (4+4)                               | 9 (4+5)                           | pT3a                                   | N1                                     |                       |
| 3824                          | 8 (4+4)                               | 9 (4+5)                           | pT3b                                   | N0                                     |                       |
| 2929                          | 8 (4+4)                               | 9 (4+5)                           | pT2                                    | N0                                     |                       |
| 3778                          | 8 (4+4)                               | 8 (4+4)                           | pT3a                                   | N0                                     |                       |
| 3760                          | 8 (4+4)                               | 7 (4+3)                           | pT2                                    | N0                                     |                       |
| 3929                          | 8 (4+4)                               | 7 (4+3)                           | pT2                                    | N0                                     |                       |

**Supplementary Table 5. Pathologic details of edicotinib-treated samples**

| <u>PA13-0291<br/>Acc #</u> | <u>Gleason Score<br/>at Biopsy</u> | <u>Gleason<br/>Score at RP</u> | <u>Pathologic T<br/>Stage at RP</u> | <u>Pathologic N<br/>Stage at RP</u> | <u>Comment</u>        |
|----------------------------|------------------------------------|--------------------------------|-------------------------------------|-------------------------------------|-----------------------|
| 3612                       | 9 (4+5)                            | 9 (4+5)                        | pT3b                                | N1                                  |                       |
| 3684                       | 9 (4+5)                            | 9 (4+5)                        | pT3b                                | N0                                  |                       |
| 3979                       | 9 (4+5)                            | 7 (4+3)                        | pT3b                                | N1                                  | Tertiary<br>pattern 5 |
| 4040                       | 9 (4+5)                            | 9 (4+5)                        | pT2                                 | N0                                  |                       |
| 4071                       | 9 (4+5)                            | 9 (4+5)                        | pT3a                                | N1                                  |                       |
| 4070                       | 9 (4+5)                            | 9 (4+5)                        | pT2                                 | N1                                  |                       |
| 4097                       | 9 (4+5)                            | 8 (3+5)                        | pT3a                                | N0                                  |                       |
| 3538                       | 8 (4+4)                            | 8 (4+4)                        | pT2                                 | N0                                  |                       |
| 3621                       | 8 (4+4)                            | 9 (4+5)                        | pT3a                                | N0                                  |                       |
| 3656                       | 8 (4+4)                            | 7 (3+4)                        | pT2                                 | N0                                  |                       |



**Supplementary Table 6. Pathologic details of control samples.**

| <b><u>PA13-0291</u></b><br><b><u>Acc #</u></b> | <b><u>Gleason Score</u></b><br><b><u>at Biopsy</u></b> | <b><u>Gleason</u></b><br><b><u>Score at RP</u></b> | <b><u>Pathologic T</u></b><br><b><u>Stage at RP</u></b> | <b><u>Pathologic</u></b><br><b><u>N Stage at</u></b><br><b><u>RP</u></b> | <b><u>Comment</u></b> |
|------------------------------------------------|--------------------------------------------------------|----------------------------------------------------|---------------------------------------------------------|--------------------------------------------------------------------------|-----------------------|
| 3498                                           | 9 (4+5)                                                | 9 (4+5)                                            | pT3a                                                    | N0                                                                       |                       |
| 3514                                           | 8 (4+4)                                                | 7 (4+3)                                            | pT2                                                     | N0                                                                       | Tertiary<br>pattern 5 |
| 3526                                           | 8 (4+4)                                                | 9 (4+5)                                            | pT3b                                                    | N0                                                                       |                       |
| 3528                                           | 9 (4+5)                                                | 9 (4+5)                                            | pT3a                                                    | N1                                                                       |                       |
| 3681                                           | 9 (4+5)                                                | 9 (5+4)                                            | pT2                                                     | N0                                                                       |                       |
| 3711                                           | 8 (4+4)                                                | 7 (4+3)                                            | pT3b                                                    | N0                                                                       |                       |
| 3720                                           | 8 (4+4)                                                | 7 (4+3)                                            | pT3a                                                    | N0                                                                       | Tertiary<br>pattern 5 |
| 3789                                           | 8 (4+4)                                                | 7 (3+4)                                            | pT3a                                                    | N0                                                                       |                       |
| 3816                                           | 8 (4+4)                                                | 7 (4+3)                                            | pT3b                                                    | N0                                                                       | Tertiary<br>pattern 5 |
| 3818                                           | 8 (4+4)                                                | 7 (4+3)                                            | pT3a                                                    | N0                                                                       | Tertiary<br>pattern 5 |
