# Supplementary material for: Immune and pathologic responses in patients with localized prostate cancer who received daratumumab (anti-CD38) or edicotinib (CSF-1R inhibitor)
Source: HighWire-hosted journal article supplement (doi:10.1136/jitc-2022-006262), 2023-03-01
Supplement: jitc-2022-006262supp003_data_supplement.pdf [file jitc-2022-006262supp003_data_supplement.pdf]

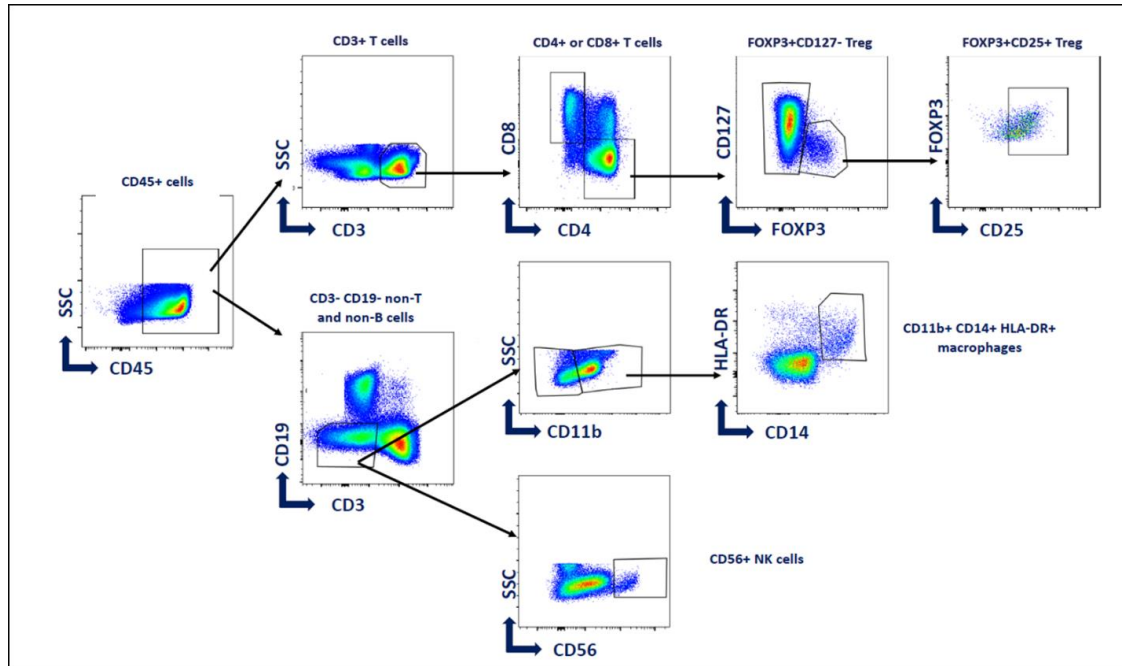

Supplementary Figure 1. Flow cytometry gating strategy.

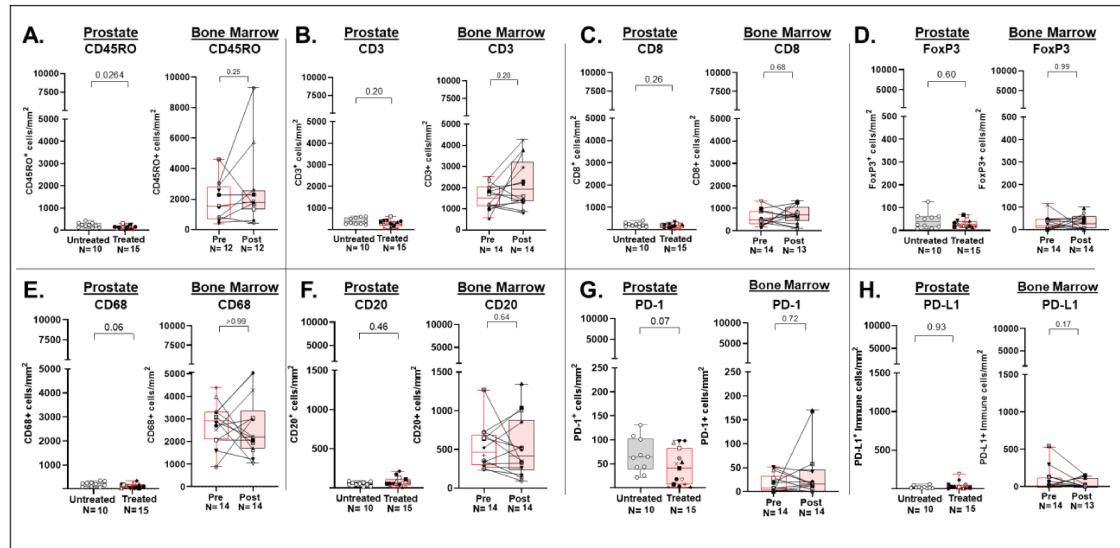

**Supplementary Figure 2. Changes in immune cell subsets and PD-1/PD-L1 in prostate tumors and bone marrow with daratumumab as assessed by IHC.** Quantitative IHC of **A.** CD45RO; **B.** CD3; **C.** CD8; **D.** FoxP3; **E.** CD68; **F.** CD20; **G.** PD-1; **H.** PD-L1. Daratumumab-treated vs. untreated prostate tumors and patient-matched pre-daratumumab and post-daratumumab bone marrow cores were assessed.

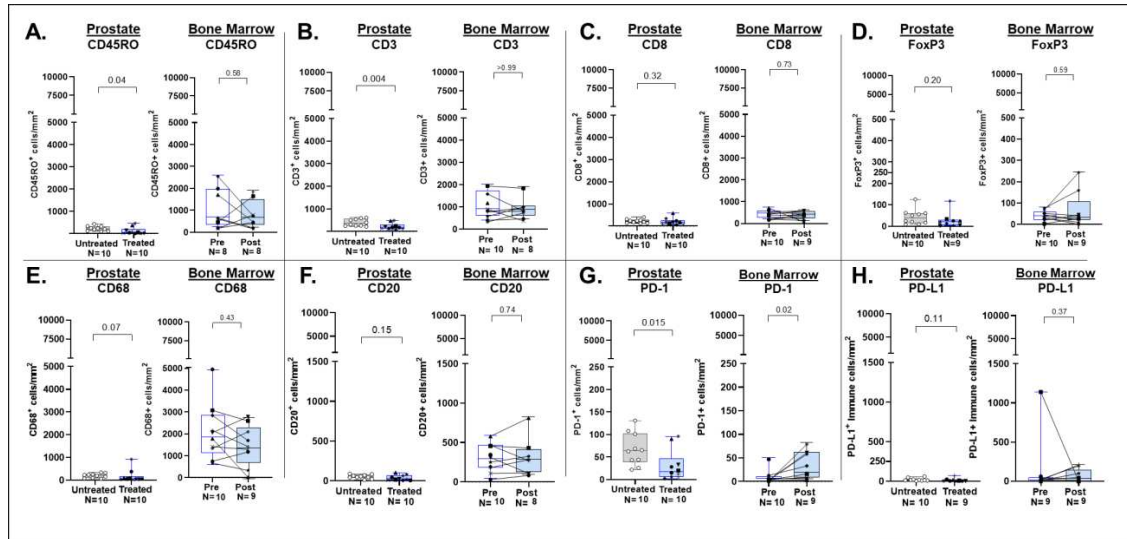

**Supplementary Figure 3. Changes in immune cell subsets and PD-1/PD-L1 in prostate tumors and bone marrow with edicotinib as assessed by IHC. Quantitative IHC of A. CD45RO; B. CD3; C. CD8; D. FoxP3; E. CD68; F. CD20; G. PD-1; H. PD-L1. Edicotinib-treated vs. untreated prostate tumors and patient-matched pre-edicotinib and post-edicotinib bone marrow cores were assessed.**

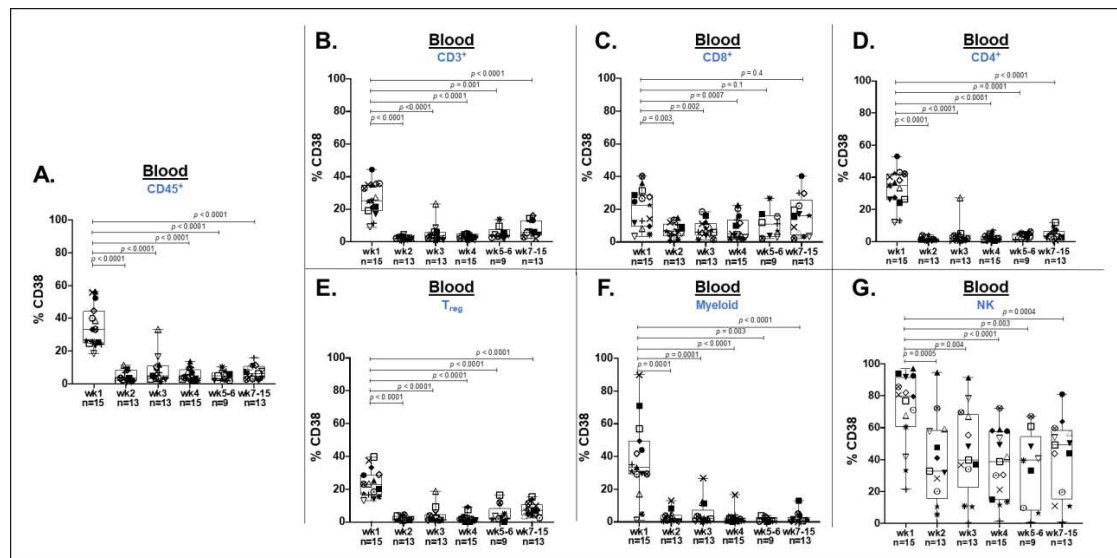

**Supplementary Figure 4. Target modulation by daratumumab in blood as assessed by flow cytometry.** Flow cytometric analysis gated on CD45<sup>+</sup> live cells showing frequency of CD38<sup>+</sup> cells in: **A.** CD45<sup>+</sup> immune cells; **B.** CD3<sup>+</sup> T cells; **C.** CD8<sup>+</sup> T cells; **D.** CD4<sup>+</sup> T cells; **E.** CD4<sup>+</sup>CD25<sup>+</sup>FoxP3<sup>+</sup> Treg cells; **F.** CD11b<sup>+</sup>CD14<sup>+</sup>HLA-DR<sup>+</sup> myeloid cells; **G.** CD3<sup>+</sup>CD19<sup>+</sup>CD56<sup>+</sup> NK cells. Peripheral blood mononuclear cells (PBMCs) from daratumumab-treated patients were assessed at the timepoints indicated.

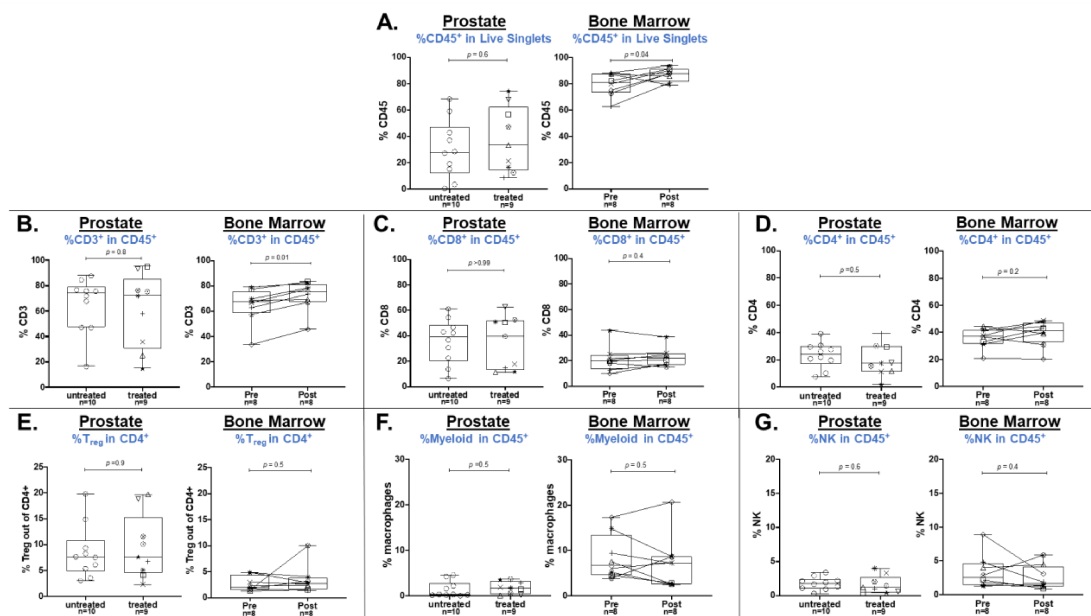

**Supplementary Figure 5. Changes in total immune cell subsets with daratumumab in prostate tumors and bone marrow as assessed by flow cytometry. A.** Flow cytometric analysis showing frequency of CD45 cells in live singlets. **B-F:** Flow cytometric analysis gated on CD45<sup>+</sup> live cells showing frequency of: **B.** CD3<sup>+</sup> T cells; **C.** CD8<sup>+</sup> T cells; **D.** CD4<sup>+</sup> T cells; **E.** CD25<sup>+</sup>FoxP3<sup>+</sup> Treg cells out of CD4<sup>+</sup> T cells; **F.** CD11b<sup>+</sup>CD14<sup>+</sup>HLA-DR<sup>+</sup> myeloid cells; **G.** CD3-CD19<sup>+</sup>CD56<sup>+</sup> NK cells. Daratumumab-treated vs. untreated prostate tumors and patient-matched pre-daratumumab and post-daratumumab bone marrow aspirates were assessed.

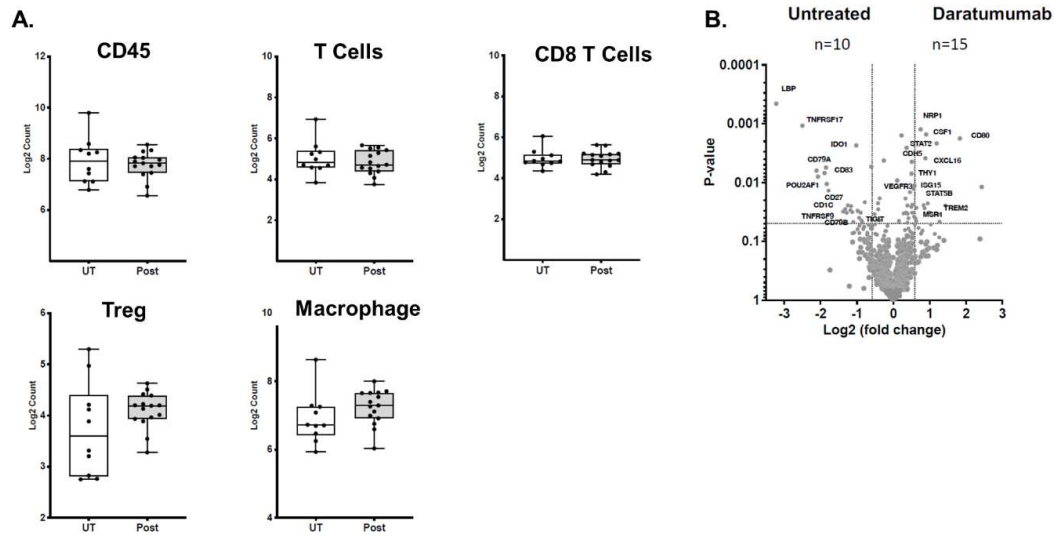

**Supplementary Figure 6. Transcriptional analysis of daratumumab-treated versus untreated prostate tumors by NanoString. A.** Scatter plots of immune cell phenotypes identified by transcriptional signatures and CD38 expression. **B.** Volcano plot of differentially expressed genes in daratumumab-treated vs. untreated prostate tumors. Dara=daratumumab.

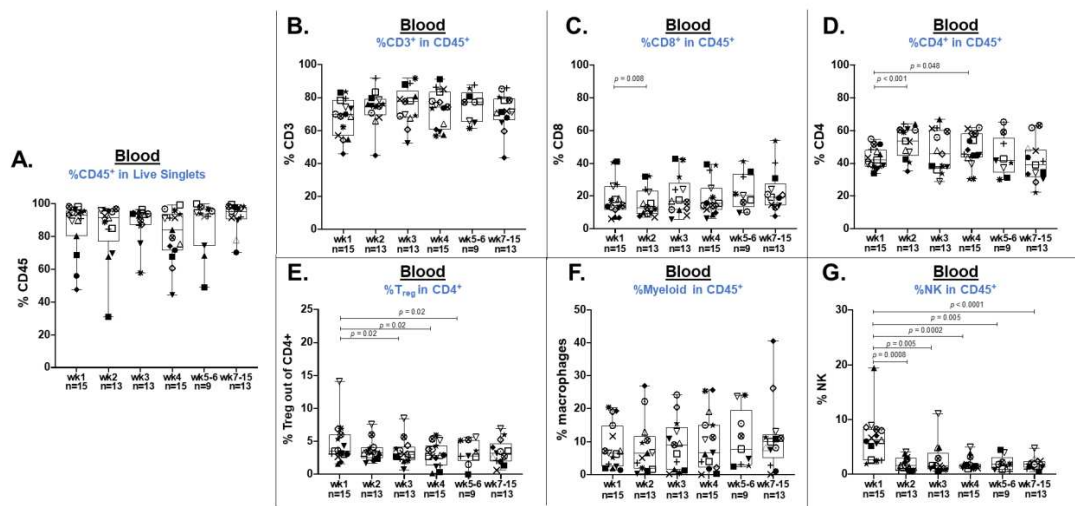

**Supplementary Figure 7. Changes in total immune cell subsets with daratumumab in blood as assessed by flow cytometry.** **A.** Flow cytometric analysis showing frequency of CD45 cells in live singlets. **B-F:** Flow cytometric analysis gated on CD45<sup>+</sup> live cells showing frequency of: **B.** CD3<sup>+</sup> T cells; **C.** CD8<sup>+</sup> T cells; **D.** CD4<sup>+</sup> T cells; **E.** CD25<sup>+</sup>FoxP3<sup>+</sup> Treg cells out of CD4<sup>+</sup> T cells; **F.** CD11b<sup>+</sup>CD14<sup>+</sup>HLA-DR<sup>+</sup> myeloid cells; **G.** CD3<sup>+</sup>CD19<sup>+</sup>CD56<sup>+</sup> NK cells. Peripheral blood mononuclear cells (PBMCs) from daratumumab-treated patients were assessed at the timepoints indicated.

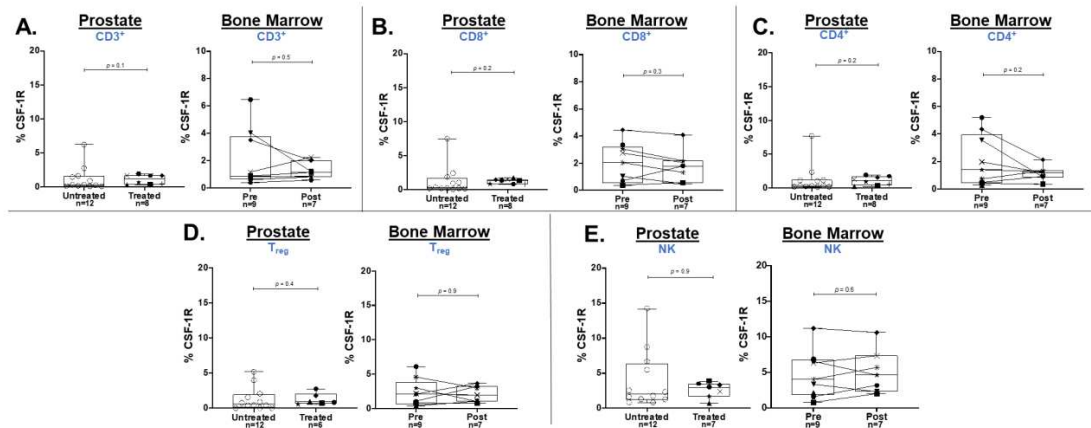

**Supplementary Figure 8. Assessment of target modulation on non-myeloid populations with edicotinib by flow cytometry in evaluable prostate tumors and bone marrow as assessed by flow cytometry.** Flow cytometric analysis gated on CD45<sup>+</sup> live cells showing frequency of CSF-1R<sup>+</sup> cells in: **A.** CD3<sup>+</sup> T cells; **B.** CD8<sup>+</sup> T cells; **C.** CD4<sup>+</sup> T cells; **D.** CD4<sup>+</sup>CD25<sup>+</sup>FoxP3<sup>+</sup> T<sub>reg</sub> cells; **E.** CD3<sup>-</sup>CD19<sup>-</sup>CD56<sup>+</sup> NK cells.



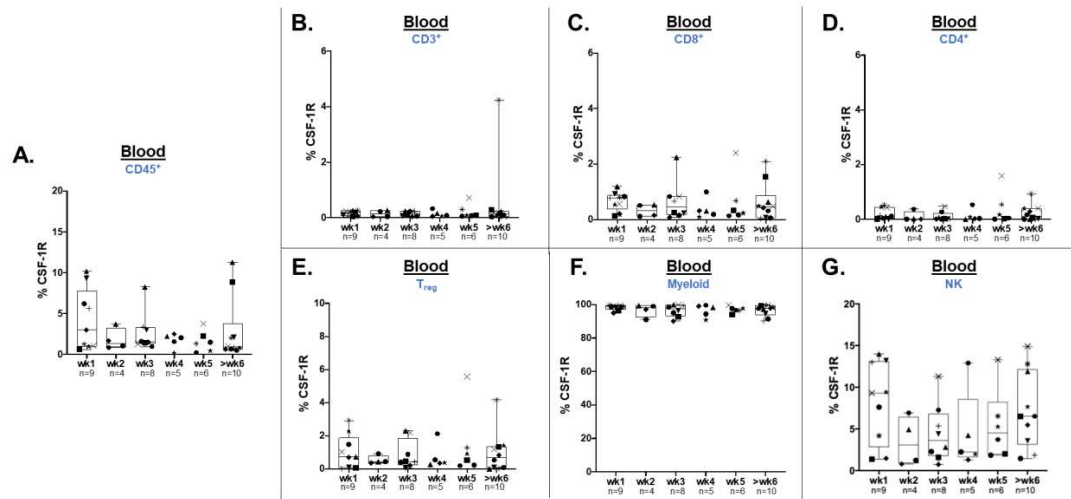

**Supplementary Figure 9. Absence of target modulation by edicotinib in blood as assessed by flow cytometry.** Flow cytometric analysis gated on CD45<sup>+</sup> live cells showing frequency of CSF-1R<sup>+</sup> cells in: **A.** CD45<sup>+</sup> immune cells; **B.** CD3<sup>+</sup> T cells; **C.** CD8<sup>+</sup> T cells; **D.** CD4<sup>+</sup> T cells; **E.** CD4<sup>+</sup>CD25<sup>+</sup>FoxP3<sup>+</sup> Treg cells; **F.** CD11b<sup>+</sup>CD14<sup>+</sup>HLA-DR<sup>+</sup> myeloid cells; **G.** CD3<sup>-</sup>CD19<sup>-</sup>CD56<sup>+</sup> NK cells. Peripheral blood mononuclear cells (PBMCs) from edicotinib-treated patients were assessed at the timepoints indicated.

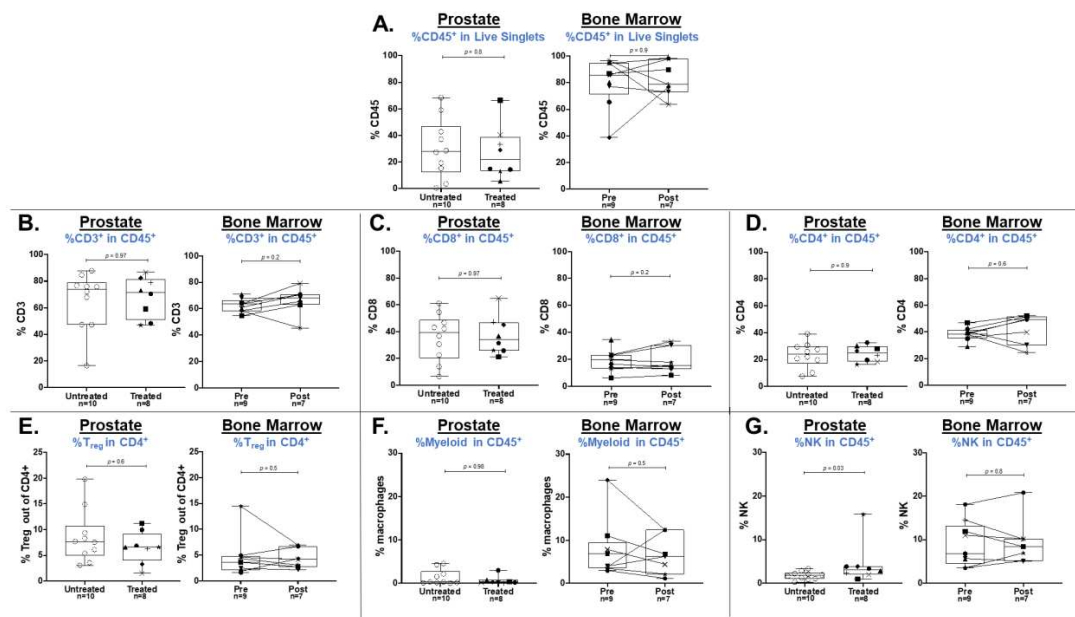

**Supplementary Figure 10. Changes in total immune cell subsets with edictotinib in prostate tumors and bone marrow as assessed by flow cytometry. A.** Flow cytometric analysis showing frequency of CD45 cells in live singlets. **B-F:** Flow cytometric analysis gated on CD45<sup>+</sup> live cells showing frequency of: **B.** CD3<sup>+</sup> T cells; **C.** CD8<sup>+</sup> T cells; **D.** CD4<sup>+</sup> T cells; **E.** CD25<sup>+</sup>FoxP3<sup>+</sup> Treg cells out of CD4<sup>+</sup> T cells; **F.** CD11b<sup>+</sup>CD14<sup>+</sup>HLA-DR<sup>+</sup> myeloid cells; **G.** CD3<sup>+</sup>CD19<sup>+</sup>CD56<sup>+</sup> NK cells. Edictotinib-treated vs. untreated prostate tumors and patient-matched pre-edictotinib and post-edictotinib bone marrow aspirates were assessed.

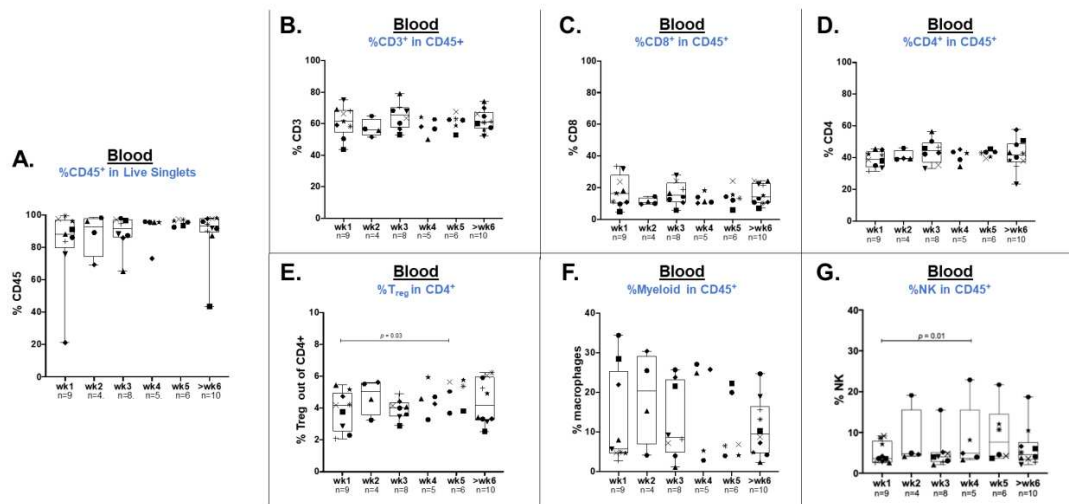

**Supplementary Figure 11. Changes in total immune cell subsets with edicotinib in blood as assessed by flow cytometry.** **A.** Flow cytometric analysis showing frequency of CD45 cells in live singlets. **B-F:** Flow cytometric analysis gated on CD45<sup>+</sup> live cells showing frequency of: **B.** CD3<sup>+</sup> T cells; **C.** CD8<sup>+</sup> T cells; **D.** CD4<sup>+</sup> T cells; **E.** CD25<sup>+</sup>FoxP3<sup>+</sup> Treg cells out of CD4<sup>+</sup> T cells; **F.** CD11b<sup>+</sup>CD14<sup>+</sup>HLA-DR<sup>+</sup> myeloid cells; **G.** CD3<sup>-</sup>CD19<sup>-</sup>CD56<sup>+</sup> NK cells. Peripheral blood mononuclear cells (PBMCs) from edicotinib-treated patients were assessed at the timepoints indicated.

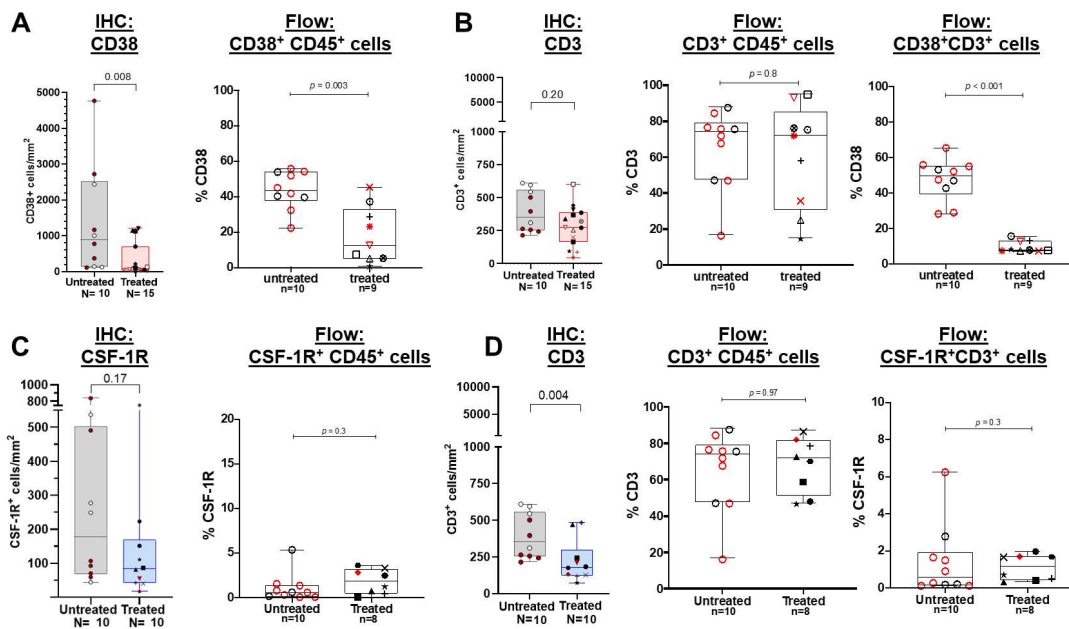

**Supplementary Figure 12. No differences in immune infiltrates between Gleason 7 and Gleason 8-10 prostate tumors as assessed at time of prostatectomy by IHC and flow cytometry. A.** CD38<sup>+</sup> cells in daratumumab-treated vs. untreated prostate tumors; **B.** CD3<sup>+</sup> T cells in daratumumab-treated vs. untreated prostate tumors; **C.** CSF-1R<sup>+</sup> cells in edicotinib-treated vs. untreated prostate tumors; **D.** CD3<sup>+</sup> T cells in edicotinib-treated vs. untreated prostate tumors. Red symbols indicate Gleason score 7 at prostatectomy.
